# Supplementary material
Source: PubMed Central journal article supplement (PMC1803005)

Supplementary Figure 1

A

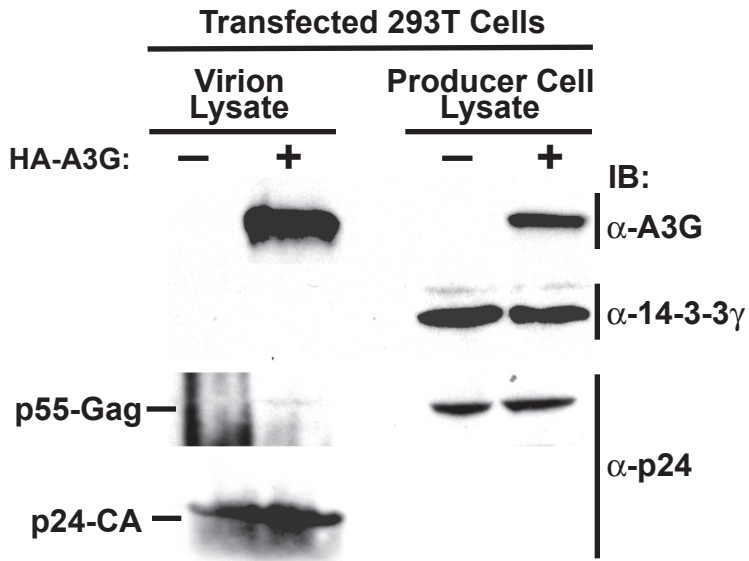

B

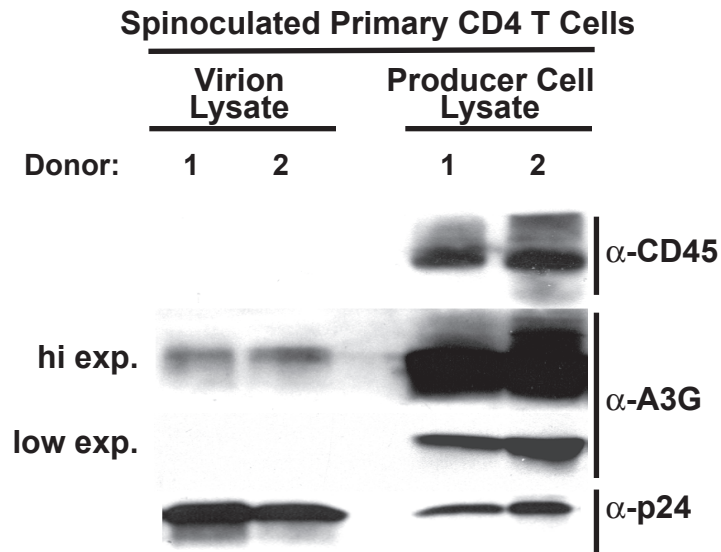

Supplement: ppat.0030015.sg001.pdf [file ppat.0030015.sg001.pdf]

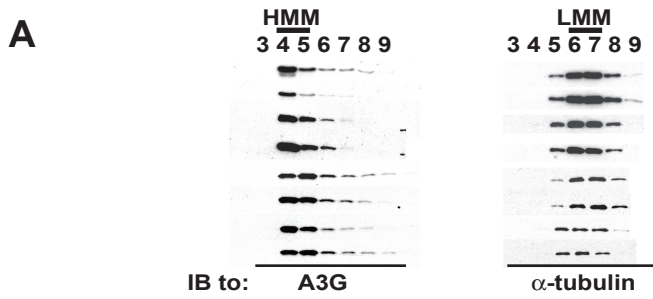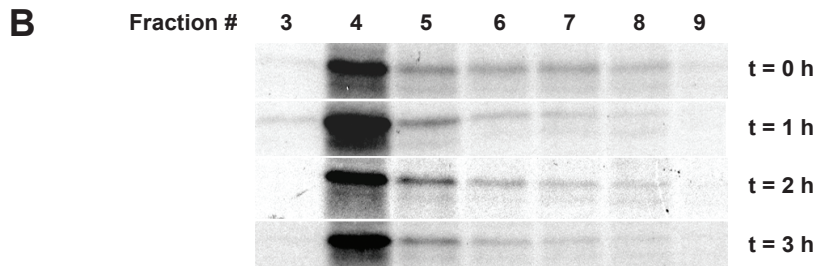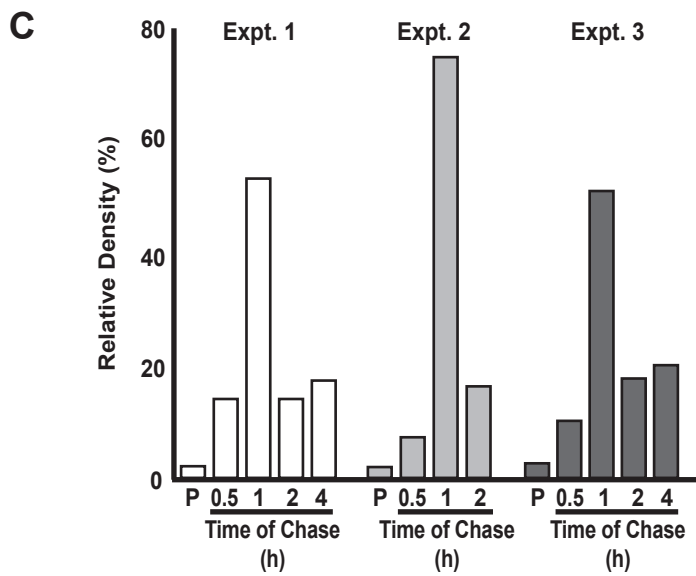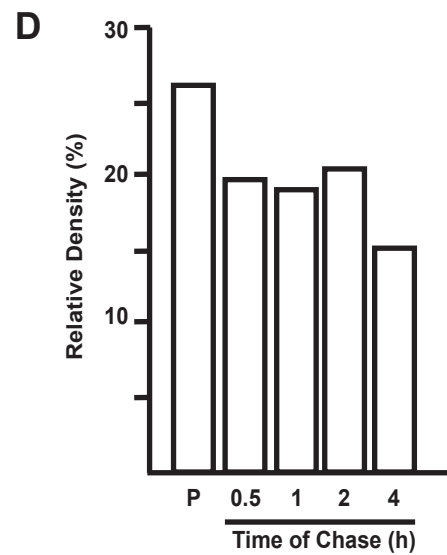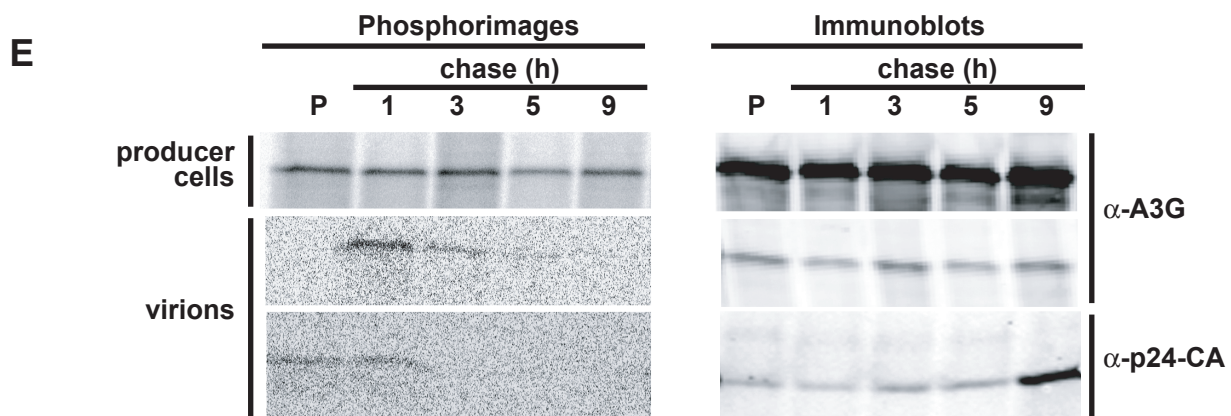

Supplement: ppat.0030015.sg002.pdf [file ppat.0030015.sg002.pdf]

Figure S3

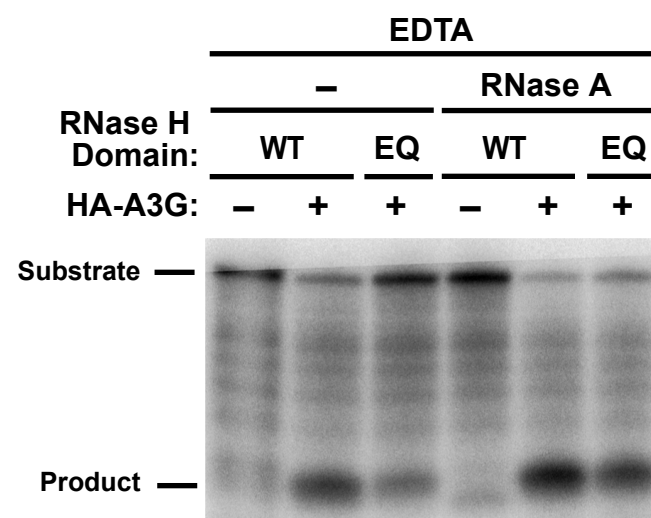

Supplement: ppat.0030015.sg003.pdf [file ppat.0030015.sg003.pdf]

Figure S4

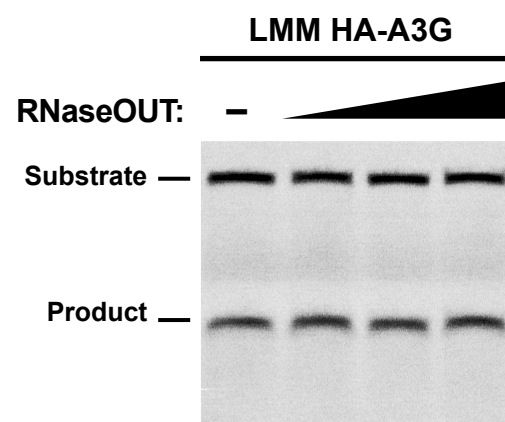

Supplement: ppat.0030015.sg004.pdf [file ppat.0030015.sg004.pdf]
